# Supplementary material for: Chromosome End Diversification in Sciarid Flies
Source: PubMed Central journal article supplement (PMC7694509; doi:10.3390/cells9112425), 2020-11-05
Supplement: cells-09-02425-s001.pdf [file cells-09-02425-s001.pdf]

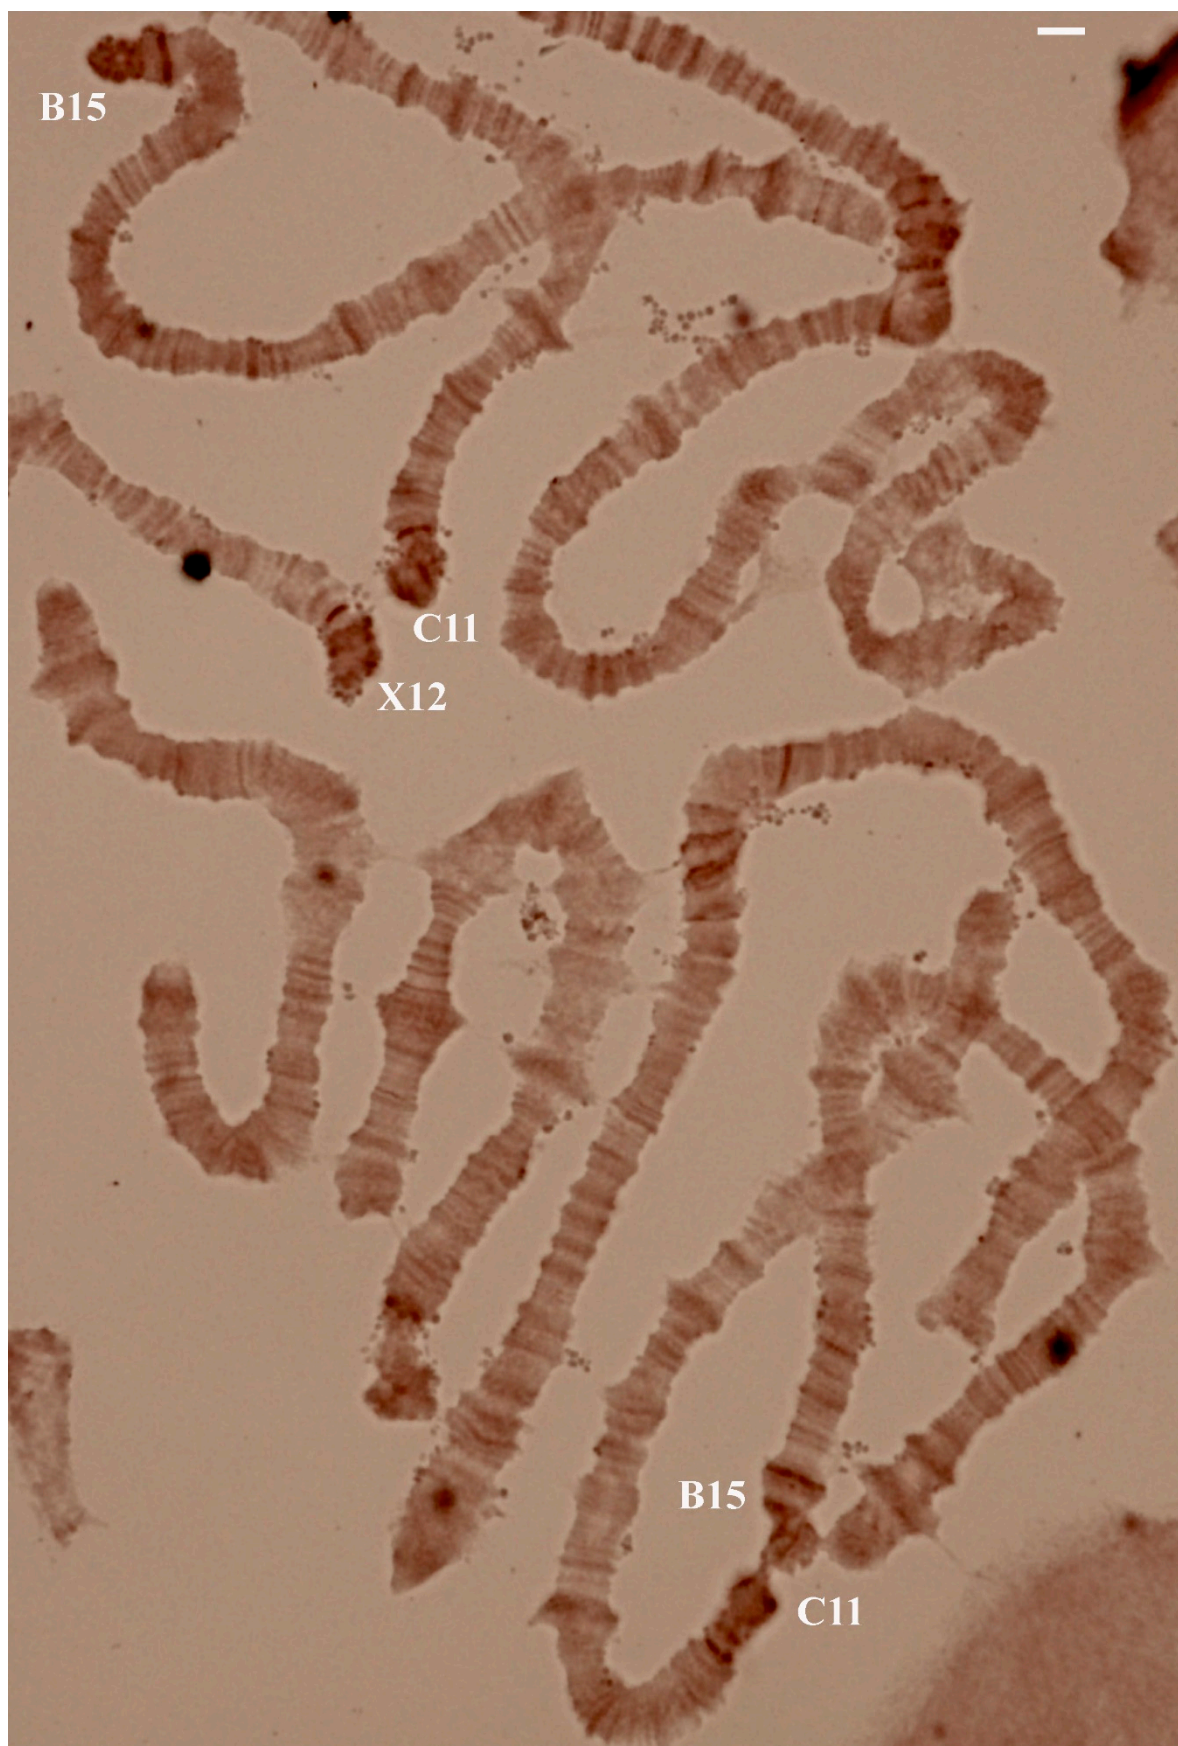

**Supplementary Figure S3.** Localization of phage 2 probe from the screening of the genomic library of *T. pubescens* in chromosomes of *R. americana*. Hybridization detection was made with alkaline

phosphatase and the chromosomes photographed under bright field. Heterochromatic ends identified in the figure correspond to the regions containing more intense hybridization signals.

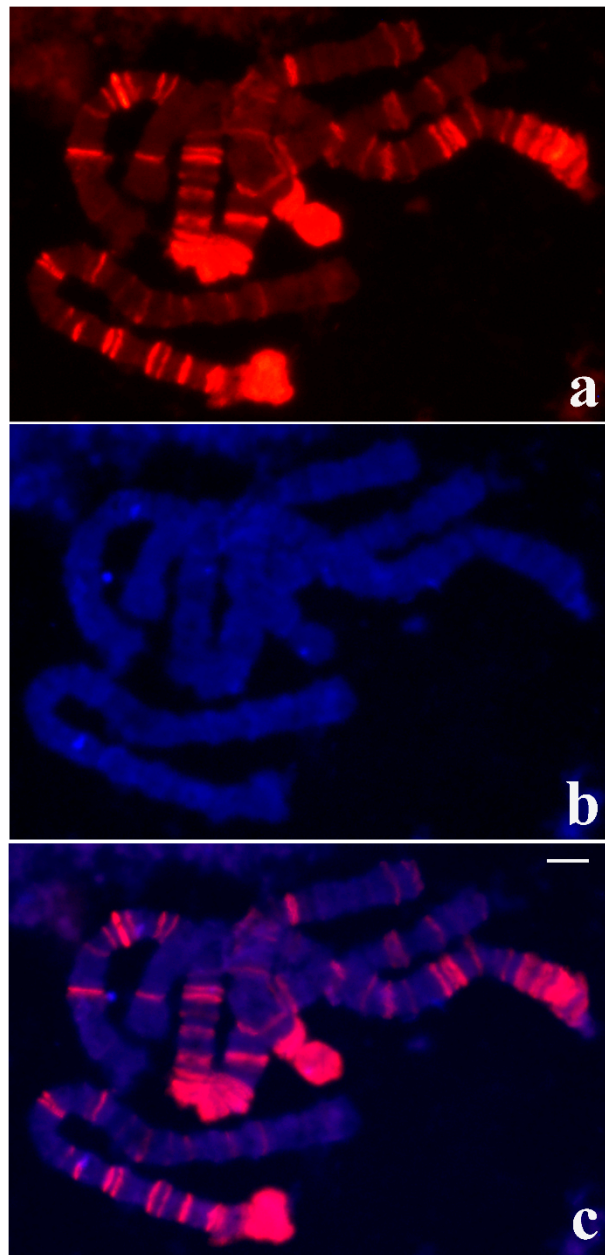

**Supplementary Figure S4.** Localization of pTp-1 probe in *T. pubescens* chromosomes. (a) hybridization signals, (b) chromosomes stained with DAPI and (c) the merged hybridization and DAPI signals. Bar = 15  $\mu$ m.

a

>pTp-2.1R

TGTCCCCGTTTCGAACGAGAGCGGTCGGAGGTTTAATCGAAAACGGAGTAGTTCGTCATGCCGATAA

TG

TAGGGCGGAAATGTGCAGTGACGAGAAAGTGTGAAAGCGGTGGACAATGCAGTTGCCAAGATAATG

GGAA

GGCTGCAAAGTACATGGAGAGAGGAGCAGCGCAGCGAAGCAAATCGTCTGATGGTCTCTGATGGCGC

GTA

AGAGCGCAGCCCCTCCCCGAAGTAATGCTGTGAGGCGTTCCGGGGAGACGAGGGCGTGGTGGCCAA  
 GGA  
 GTGAGGGTTTAGTCGGTAAGAATCCGACACTCTGGGTGCTAATTCCAGATGTCTATGAAGATTCCCTC  
 AA  
 CCTTGTAAAAAAAAAAAAAAAAAAAAAAAAACACACACACACACACACGTAATTATTTCACTTA  
 TTTG  
 CTACTTTTTGTAGCAGTATTTACGGTCTTTGTTATCATGATTCGTGAAGTAAACACTGAAGCTCACTGTG  
 TACGTAATTTATTCCGACTCCATAAAATCTGTCAATAAAGGAATAATTTTATAACAATGTACCATTCA  
 A  
 GACCTATTATGTTCTTCGACGTCCTGGAAATTGACAGATAATAAGGTAAACATTTGCTTACAGTTTCA  
 A  
 ACTGGTCTGAAATACACTTAGGAAGCTTCTCGTGAAGTATCGTTTTAGGAACTAGGGGAGACACTGG  
 TT  
 ACTCACCTTACAATGACTTTTAGTAAGCGATTATAAAACTACATCAAACACTTCATCTTAAATGTCACA  
 A  
 TAACTACACGTAAAAAGTACAATATGAATAAAATGATTTGCCTTCACGTTACTTCCTCACAATTAAT  
 GG  
 GTCCTGGTAATGAACTAGTTGGTGATGAACCTATAGCCAGTGATGATCGTATAGCTCAACAACATGAC  
 AT  
 AGCGTATGACAATGCAGTTGACGAAGGTGACATTTATGAAGCTGACGAGAGGGCGATTTTTGCATTCC  
 TA  
 CTAGATTGGATTAATAAAATAAAAATTGGCATTCTGCTATTGGAGTCATGGGTTTAGGCGTTAAACATT  
 A  
 TTAGATGTAATATGCTGTAGAGTTTTTTATTGAAGTAATTGGTCNANAGGACTGGTGAACACCACTGTC  
 G  
 ATAACCGTTTGCATTGGATGTACAGAGAAAAGATCCAATTCGATTTTACATTCATTTATGAGCTTTG  
 T  
 TTATGTACGCCATTTTAAATTTGTAAAAAAATCGTTATGTTTTTCTTGTGTTCTAGTAGTTGCCTTT  
 TTAGTCGTTACTGTTTTACGTTTCTTGATGTTGCCCGTTGAGNGACTTTACTCGAATTGTGTTGCTCT  
 ACTTTGAAAAGTTTTCTGCTGTTGGGTGANAAGTTTTTCTTAAAATTGNTTCTCAG

**b**

**VP [Haematobia irritans densovirus]**

**Sequence ID: [QCH41363.1](#) Length: 687 Number of Matches: 1**

**Range 1: 4 to 64 [GenPeptGraphics](#) Alignment statistics for match #1**

| Score          | Expect | Method                       | Identities | Positives  | Gaps     |
|----------------|--------|------------------------------|------------|------------|----------|
| 61.2 bits(147) | 6e-06  | Compositional matrix adjust. | 31/61(51%) | 40/61(65%) | 0/61(0%) |

+3

Query 813 FTLLPHN\*MGPGNELVGDEPIASDDRIAQQHDIAYDNAVDEGDIYADERAIFAFVLDWI 992  
 FTL++ +GPGN L EPI D IA++HDIAYD A +DIY+AD AI F D++  
 Sbjct 4 FTLIGYKYLGPNSLDKGEPINKADSIAREHDIAYDRAKTKEDIYKADREAIQFKDDFL 63

Query 993 K 995

K

Sbjct 64 K 64

**Structural protein [Periplaneta fuliginosa densovirus]****Sequence ID: [NP\\_051016.1](#) Length: 242 Number of Matches: 1****Range 1: 154 to 223 [GenPeptGraphics](#) Alignment statistics for match #1**

| Score          | Expect | Method                       | Identities | Positives  | GapsFrame |
|----------------|--------|------------------------------|------------|------------|-----------|
| 48.5 bits(114) | 0.019  | Compositional matrix adjust. | 28/70(40%) | 39/70(55%) | 0/70(0%)  |

+3

Query 828 HN\*MGPGNELVGDEPIASDDRIAQQHDIAYDNAVDEGDIYEADERAIFAFVLDWIKK\*KL  
1007

H+ +GPGN L +EP+ DD IA++HD AY NA D+ AD++AI F D+ K L

Sbjct 154 HHYLGPGNPLDNNPVDRDDAIAEEHDKAYANAKSSIDVINADKKAIDHFSDFEKNGNL  
213

Query 1008 AFCYWSHGFR 1037

G +

Sbjct 214 HSLIGKTGLQ 223

**Viral protein, partial [Helicoverpa armigera densovirus]****Sequence ID: [AEI26261.1](#) Length: 448 Number of Matches: 1****Range 1: 8 to 63 [GenPeptGraphics](#) Alignment statistics for match #1**

| Score          | Expect | Method                       | Identities | Positives  | GapsFrame |
|----------------|--------|------------------------------|------------|------------|-----------|
| 50.8 bits(120) | 0.007  | Compositional matrix adjust. | 27/57(47%) | 35/57(61%) | 1/57(1%)  |

+3

Query 828 HN\*MGPGNELVGDEPIASDDRIAQQHDIAYDNAVDEGDIYEADERAIFAFVLDWIKK 998  
HN+GPG + EP+ DD IA++HD+AY NA DIY+AD+ A F D KK

Sbjct 8

HNLYLPGTKDFTKEPVDEDEIARRHDLAYANATSHQDIYKADKEASKEF-FDSFKK 63

**Structural protein VP [Human CSF-associated densovirus]****Sequence ID: [ANG55948.1](#) Length: 840 Number of Matches: 1****Range 1: 243 to 302 [GenPeptGraphics](#) Alignment statistics for match #1**

| Score          | Expect | Method                       | Identities | Positives  | GapsFrame |
|----------------|--------|------------------------------|------------|------------|-----------|
| 50.4 bits(119) | 0.015  | Compositional matrix adjust. | 26/60(43%) | 37/60(61%) | 0/60(0%)  |

+3

Query 810 AFTLLPHN\*MGPGNELVGDEPIASDDRIAQQHDIAYDNAVDEGDIYEADERAIFAFVLDW  
989

+TL H +GPGN + +P+ DD IA++HD AY A ++DI ADE+A F+ DW

Sbjct 243 GYTLPGHKFIGPGNPVDTEVPVDEDDAIAKEHDEAYATAKNQKDIAIADEQAADKFLSDW  
302

**Supplementary Figure S5.** (a) Partial sequence of pTp-2.1 plasmid. (b) Protein alignment results obtained by BLASTx.
